# Supplementary material for: Causal Relationships between Daily Physical Activity, Physical Function, and Cognitive Function Ultimately Leading to Happiness
Source: MDPI journal article supplement (doi:10.3390/ijerph20043016), 2023-02-09
Supplement: s1 [file s1]

Supplemental Table S1. Partial correlations between cognitive function and daily physical activities controlled by 2-step test

|                                     |                     | Cognitive function |            |               |        |        |
|-------------------------------------|---------------------|--------------------|------------|---------------|--------|--------|
|                                     |                     | Block Design       | Digit Span | Symbol Search | Coding | MMSE-J |
| Controlled variable:<br>2 step test | Calorie consumption | -0.06              | -0.10      | 0.05          | -0.06  | 0.14   |
|                                     | Steps               | -0.08              | -0.17      | 0.02          | -0.23  | 0.31   |
|                                     | MVPA                | -0.18              | -0.22      | 0.03          | -0.21  | 0.11   |

MMSE-J: Mini Mental State Examination- Japanese version and MVPA: Moderate-to-Vigorous Physical Activity

Supplemental Table S2. Partial correlations between physical function and QOL controlled by Symbol Search

|                                       |     | Physical function |          |        |
|---------------------------------------|-----|-------------------|----------|--------|
|                                       |     | Stand up          | 5 m walk | 2-step |
| Controlled variable:<br>Symbol Search | QOL | 0.16              | 0.00     | 0.00   |

QOL: WHOQOL26

Supplemental Table S3. Partial correlations between happiness and cognitive function controlled by QOL

|                          |               | Happiness |
|--------------------------|---------------|-----------|
| Controlled variable: QOL | Block Design  | -0.07     |
|                          | Digit Span    | -0.02     |
|                          | Symbol Search | -0.05     |
|                          | Coding        | 0.10      |
|                          | MMSE-J        | -0.22     |

Happiness: Oxford Happiness Questionnaire; QOL: WHOQOL26; MMSE-J: Mini Mental State Examination- Japanese version
